## OpenSAFELY NHS Service Restoration Observatory 2: changes in primary care activity across six clinical areas during the COVID-19 pandemic

Helen J Curtis<sup>1\*</sup>, Brian MacKenna<sup>1\*</sup>, Milan Wiedemann<sup>1</sup>, Louis Fisher<sup>1</sup>, Richard Croker<sup>1\*</sup>, Caroline E Morton<sup>1</sup>, Peter Inglesby<sup>1</sup>, Alex J Walker<sup>1</sup>, Jessica Morley<sup>1</sup>, Amir Mehrkar<sup>1</sup>, Sebastian CJ Bacon<sup>1</sup>, George Hickman<sup>1</sup>, David Evans<sup>1</sup>, Tom Ward<sup>1</sup>, Simon Davy<sup>1</sup>, William J Hulme<sup>1</sup>, Orla Macdonald<sup>1</sup>, Robin Conibere<sup>2</sup>, Tom Lewis<sup>3</sup>, Martin Myers<sup>4</sup>, Shamila Wanninayake<sup>5</sup>, Kiren Collison<sup>6</sup>, Charles Drury<sup>7</sup>, Miriam Samuel<sup>8</sup>, Harpreet Sood<sup>9</sup>, Andrea Cipriani<sup>10,11</sup>, Seena Fazel<sup>10,11</sup>, Manuj Sharma<sup>12</sup>, Wasim Baqir<sup>6</sup>, Chris Bates<sup>13</sup>, John Parry<sup>13</sup>, Ben Goldacre<sup>1</sup>

(\*These authors contributed equally to this work)

Corresponding: [ben.goldacre@phc.ox.ac.uk](mailto:ben.goldacre@phc.ox.ac.uk)

<sup>1</sup> The Bennet Institute for Applied Data Science, Nuffield Department of Primary Care Health Sciences, University of Oxford, OX2 6GG, UK

<sup>2</sup> Beacon Medical Group, Plymouth, UK

<sup>3</sup> Northern Devon Healthcare NHS Trust, UK

<sup>4</sup> Lancashire Teaching Hospitals NHS Foundation Trust, UK

<sup>5</sup> The Manor Surgery, Oxford, UK

<sup>6</sup> NHS England and NHS Improvement, London, UK

<sup>7</sup> Herefordshire and Worcestershire Health and Care NHS Trust, UK

<sup>8</sup> Wolfson Institute of Population Health (Queen Mary University of London)

<sup>9</sup> University College London Hospitals NHS Foundation Trust

<sup>10</sup> Department of Psychiatry, University of Oxford, Oxford

<sup>11</sup> Oxford Health NHS Foundation Trust, Warneford Hospital, Oxford

<sup>12</sup> Department of Primary Care and Population Health, University College London.

<sup>13</sup> TPP, TPP House, 129 Low Lane, Horsforth, Leeds, LS18 5PX

## Abstract

### Background

The COVID-19 pandemic has disrupted healthcare activity across a broad range of clinical services. The NHS stopped non-urgent work in March 2020, later recommending services be restored to near-normal levels before winter where possible.

### Aims

Using routinely collected data, our aim was to describe changes in the volume and variation of coded clinical activity in general practice in: (i) cardiovascular disease, (ii) diabetes, (iii) mental health, (iv) female and reproductive health, (v) screening, and (vi) processes related to medication.

## **Design and setting**

With the approval of NHS England, we conducted a cohort study of 23.8 million patient records in general practice, in-situ using OpenSAFELY.

## **Methods**

We selected common primary care activity using CTV3 codes and keyword searches from January 2019 - December 2020, presenting median and deciles of code usage across practices per month.

## **Results**

We identified substantial and widespread changes in clinical activity in primary care since the onset of the COVID-19 pandemic, with generally good recovery by December 2020. A few exceptions showed poor recovery and warrant further investigation, such as mental health, e.g. "Depression interim review" (median across practices in December 2020 -41.6% compared to December 2019).

## **Conclusions**

Granular NHS GP data at population-scale can be used to monitor disruptions to healthcare services and guide the development of mitigation strategies. The authors are now developing real-time monitoring dashboards for key measures identified here as well as further studies, using primary care data to monitor and mitigate the indirect health impacts of Covid-19 on the NHS.

## **How this fits in**

During the COVID-19 pandemic, routine healthcare services in England faced significant disruption, and NHS England recommended restoring NHS services to near-normal levels before winter 2020. Our previous report covered the disruption and recovery in pathology tests and respiratory activity: here we describe an additional six areas of common primary care activity. We found most activities exhibited significant reductions during pandemic wave 1 (with most recovering to near-normal levels by December); however many important aspects of care - especially those of a more time-critical nature - were maintained throughout the pandemic. We recommend key measures for ongoing monitoring and further investigation of the impacts on health inequalities, to help measure and mitigate the ongoing indirect health impacts of COVID-19 on the NHS.

## Background

The COVID-19 pandemic disrupted healthcare services globally.<sup>1</sup> In March 2020, NHS England initially promoted measures to reduce viral transmission and provide only essential health services.<sup>2,3</sup> The World Health Organisation (WHO) recommended rapid assessments of healthcare capacity and the development of key performance indicators.<sup>4,5</sup> From August 2020, NHS England aimed to restore primary care and other services back to normal activity where clinically appropriate.<sup>6</sup>

Various studies have assessed the impact of the pandemic on non-COVID health services, for example mental health, female and reproductive health, health screenings, and prescribing.<sup>7-10</sup> Overall, findings suggest a substantial decrease from the first official lockdown in the UK (March 2020), with recovery to near-normal activity in most clinical areas from around July 2020. We previously reported a data-driven approach for monitoring healthcare disruptions and recovery using the OpenSAFELY platform (<https://www.opensafely.org/>) combined with input from a clinical advisory group, intended to explore changes in high volume areas, including those that might otherwise be missed.<sup>11</sup> Selecting pathology tests and respiratory conditions as key examples, we showed that activity largely decreased substantially and subsequently recovered. However, we also found that some activities such as blood coagulation tests were well-maintained, suggesting that important clinical care was effectively prioritised.<sup>11</sup> Certain clinical conditions like cardiovascular disease (CVD) and diabetes are associated with higher risk of morbidity and mortality from COVID-19, emphasising the importance of maintaining good routine care.<sup>12-15</sup>

We therefore set out to generate an overall picture of changes in clinical activity in primary care across key areas of medicine; and to identify key measures to continuously monitor the impacts of COVID-19 on the NHS and inform further studies. Specifically we extended our earlier study<sup>11</sup> to December 2020 and expanded our work to cover six further clinical areas: cardiovascular disease, diabetes, mental health, female and reproductive health, screening procedures, and processes related to medication.

## Methods

### Study design and data source

Following the methodology previously described<sup>11</sup>, we conducted a cohort study using routinely collected pseudonymised primary care electronic health records (EHR) in the OpenSAFELY-TPP platform (<https://opensafely.org>). This included 40% of England's general practices (2,500, those using TPP SystemOne software), covering 24m patients. In brief, this structured GP data includes one record for every diagnostic code, prescription, blood test, investigation, or similar in primary care.

### Study population and data processing

The study population and data processing were as in our previous study<sup>11</sup>, except for a later study end date (31st December 2020), and included all patients registered with a general practice on 31st December 2020. Briefly, we counted occurrences of all coded clinical activities per month throughout 2019-2020, by Clinical Terms Version 3 (CTV3) code (including diagnoses, investigations and other clinical/administrative processes, but excluding medications/vaccinations), grouped by general practice. We excluded any codes with less than 1000 total occurrences in 2020 to identify the most frequent clinical activities. We used the CTV3 parent-child hierarchy (e.g. 24: '*Examination of cardiovascular system*'; 242: '*O/E - pulse rate*') to group similar activities, and mapped each code to high level CTV3 concepts to assist with categorisation into broad topics (e.g. "cardiovascular"). For each code/group we calculated the monthly rate of code usage per 1000 registered patients and the median and deciles across practices.

### Study measures

We pragmatically grouped activity and selected clinical codes relevant to each of the following topics: Cardiovascular disease, Diabetes, Mental health, Female and reproductive health, Screening and related procedures, and Processes related to medication. We did not include prescribing, which is coded in GP systems using the NHS dictionary of medicines and devices, as high quality routinely updated analysis of primary care dispensing data is already openly available on our partner service OpenPrescribing (<https://openprescribing.net>). The selection of clinical codes was largely based on existing CTV3 concepts and keyword searching. A detailed description of our methodology is available in Supplementary Information and Table S1.

### Clinical advisory group

We established a clinical advisory group to review our findings, consisting of general practitioners, pharmacists, pathologists, other relevant specialists, and national clinical advisors, formed by invitation of clinicians known through existing professional relationships. The raw results of our data driven approach on each topic were discussed with the advisory group during a series of online meetings to prioritise clinical topics and inform interpretation. The group also had the opportunity to comment on these documents outside of the

meetings, and if needed arrange further meetings with the research team. Additionally the group was asked to select “key measures” of activity from each clinical area to direct targeted work on health inequalities.

## Software and reproducibility

Data management and analysis were performed using Python 3.8. Code for data management and analysis are available online (<https://github.com/opensafely/restoration-observatory-data-driven>).

## Patient and public involvement

We have developed a publicly available website <https://opensafely.org/> through which we invite any patient or member of the public to contact us regarding this study or the broader OpenSAFELY project.

## Results

All included clinical codes/groups for each topic along with their total 2020 usage are shown in Tables S2-S7. We summarise results by topic, highlighting selected code usage at key points in the pandemic in England (February, April and December 2020; Table 1).

**Table 1. Rate of recording of selected CTV3 codes and groups of codes for each topic in February, April and December 2020.** (a) cardiovascular disease (CVD), (b) diabetes, (c) mental health, (d) female & reproductive health, (e) screening procedures, and (f) processes related to medication. Showing median rate across English practices per 1000 registered patients and % change on same month in previous year. Further detailed breakdowns of code recording are shown in Table S2.

| Topic             | CTV3 code/group                                               | Median rate per 1000 registered patients<br>(% change on previous year) |                  |                  |
|-------------------|---------------------------------------------------------------|-------------------------------------------------------------------------|------------------|------------------|
|                   |                                                               | February                                                                | April            | December         |
| (a) CVD           | "24" - Examination of cardiovascular system                   | 164.2                                                                   | 19.8<br>(-86.9%) | 82.6<br>(-42.6%) |
|                   | "18" - Cardiovascular symptoms (& [heart])                    | 0.6                                                                     | 0.3<br>(-57.1%)  | 0.4<br>(-17.7%)  |
|                   | "G5" - Other forms of heart disease                           | 0.5                                                                     | 0.3<br>(-48.9%)  | 0.4<br>(-6.4%)   |
|                   | "XaQVY" - QRISK2 cardiovascular disease 10 year risk score    | 6.9                                                                     | 0.6<br>(-98.3%)  | 3.0<br>(-38.9%)  |
|                   | "XaKfX" - Average home systolic blood pressure                | 0.4                                                                     | 0.2<br>(-8.1%)   | 0.7<br>(+102.8%) |
|                   | "XaKfW" - Average home diastolic blood pressure               | 0.4                                                                     | 0.2<br>(-8.3%)   | 0.6<br>(+98.0%)  |
| (b) Diabetes      | "66A" - Diabetic monitoring                                   | 4.6                                                                     | 0.4<br>(-87.5%)  | 3.3<br>(-16.6%)  |
|                   | "XaPbt" - Haemoglobin A1c level - IFCC standardised           | 28.2                                                                    | 3.4<br>(-86.2%)  | 22.4<br>(-0.6%)  |
|                   | "Xallj" - Diabetic retinopathy screening                      | 1.8                                                                     | 0.0<br>(-100.0%) | 0.7<br>(-53.7%)  |
|                   | "XaleH" - O/E - Right diabetic foot at low risk               | 3.8                                                                     | 0.0<br>(-100.0%) | 2.7<br>(-18.0%)  |
|                   | "XaluE" - Diabetic foot examination                           | 0.2                                                                     | 0.0<br>(-100.0%) | 0.2<br>(+113.8%) |
| (c) Mental Health | "E2" - Neurotic, personality and other nonpsychotic disorders | 1.2                                                                     | 0.6<br>(-44.5%)  | 0.8<br>(-23.7%)  |
|                   | "E20" - Neurotic disorder                                     | 0.8                                                                     | 0.5<br>(-39.1%)  | 0.5<br>(-21.9%)  |
|                   | "XaK6f" - Depression interim review                           | 0.9                                                                     | 0.4<br>(-56.2%)  | 0.6<br>(-41.6%)  |

|                                     |                                                                        |      |                  |                  |
|-------------------------------------|------------------------------------------------------------------------|------|------------------|------------------|
|                                     | "XE0re" - Depressed mood                                               | 0.6  | 0.2<br>(-64.7%)  | 0.4<br>(-19.9%)  |
| (d) Female & Reproductive health    | "61" - Contraception                                                   | 3.2  | 1.2<br>(-60.6%)  | 3.0<br>(+12.1%)  |
|                                     | "15" - [Gynaecological] or [obstetric] history                         | 1.7  | 0.8<br>(-51.3%)  | 1.3<br>(-17.2%)  |
|                                     | "64" - (Child health care)(inf feed meth)(breast/oth feed diff age)    | 1.1  | 0.8<br>(-33.0%)  | 1.0<br>(-11.8%)  |
|                                     | "K3" - Disorder of breast                                              | 0.2  | 0.1<br>(-57.9%)  | 0.2<br>(+17.8%)  |
|                                     | "621" - Patient currently pregnant                                     | 0.9  | 0.7<br>(-26.6%)  | 0.8<br>(-8.0%)   |
| (e) Screening                       | "XaPVj" - Bowel cancer screening programme: faecal occult blood result | 6.4  | 3.0<br>(-52.1%)  | 6.5<br>(+12.0%)  |
|                                     | "Xa8PI" - Cervical smear                                               | 4.8  | 0.2<br>(-95.6%)  | 3.9<br>(+20.9%)  |
|                                     | "XaRBQ" - NHS Health Check completed                                   | 1.8  | 0.0<br>(-100.0%) | 0.0<br>(-100.0%) |
| (f) Processes related to medication | "XaF8d" - Medication review done                                       | 22.7 | 14.6<br>(-31.0%) | 18.7<br>(-8.2%)  |
|                                     | "XaJKW" - Patient understands why taking all medication                | 0.1  | 0.0<br>(-100.0%) | 0.4<br>(+422.2%) |

## Cardiovascular disease (CVD)

The majority of cardiovascular disease coded activity experienced a substantial decline during the initial stages of the pandemic, with limited recovery by September 2020 that levelled off through to December 2020, e.g. blood pressure recording and electrocardiography (Figure 1a-b).

Exceptions included symptoms related to cardiovascular system (Figure 1c), which experienced a sustained drop (April -57.1%, December -17.7%); "other forms of heart disease" (Figure 1d), including atrial fibrillation and heart failure, experienced a small drop but largely recovered (April -48.9%, December -6.4%); QRISK2 (XaQVY), a CVD risk tool, dropped dramatically (-98.3%) with limited recovery (December -38.9%). Blood pressure at home codes increased overall (+100% in December, Figure 1f), but were infrequently used (410k, 400k total events, Table S2) compared to blood pressure codes recorded with no setting (11 million, Figure 1a).



**a 24 “Examination of cardiovascular system (& [vascular system])”**

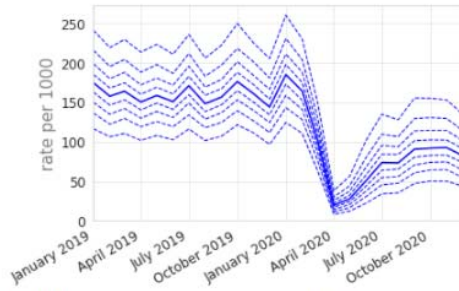

Top 'child' codes represented within parent code above:

|   | first_digits | 2020 events (thou) | Description                    |
|---|--------------|--------------------|--------------------------------|
| 0 | 2469         | 11257.9            | O/E - Systolic BP reading      |
| 1 | 246A         | 11242.3            | O/E - Diastolic BP reading     |
| 2 | 2431         | 1611.9             | O/E - pulse rhythm regular     |
| 3 | 242          | 859.0              | O/E - pulse rate               |
| 4 | 24E8         | 411.9              | O/E - R.dorsalis pedis present |

**b 32 “Electrocardiography”**

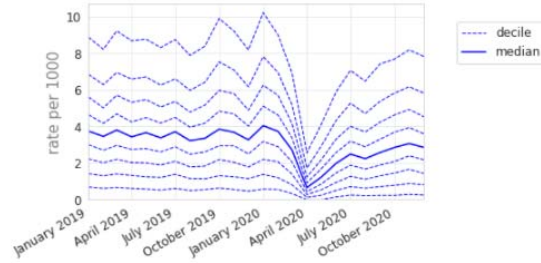

Top 'child' codes represented within parent code above:

|    | first_digits | 2020 events (thou) | Description         |
|----|--------------|--------------------|---------------------|
| 37 | 3212         | 552.6              | Standard ECG        |
| 38 | 32           | 145.7              | Electrocardiography |
| 39 | 321          | 111.7              | ECG - general       |
| 40 | 3216         | 95.7               | ECG normal          |
| 41 | 3211         | 30.5               | ECG requested       |

**c 18 “Cardiovascular symptoms (& [heart])”**

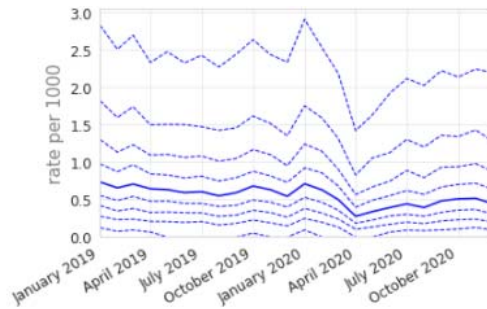

Top 'child' codes represented within parent code above:

|    | first_digits | 2020 events (thou) | Description            |
|----|--------------|--------------------|------------------------|
| 58 | 182          | 111.9              | Chest pain             |
| 59 | 1811         | 32.6               | No palpitations        |
| 60 | 1831         | 29.6               | No oedema present      |
| 61 | 1821         | 26.7               | Chest pain not present |
| 62 | 1828         | 12.0               | Atypical chest pain    |

**d G5 “Other forms of heart disease”**

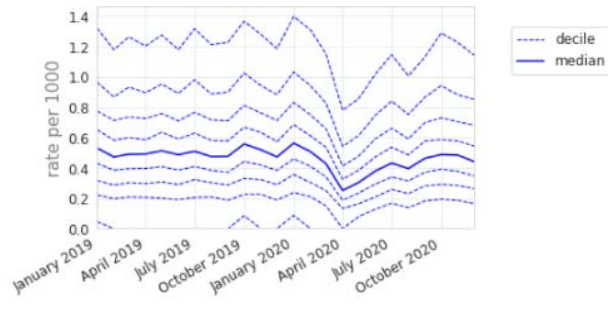

Top 'child' codes represented within parent code above:

|    | first_digits | 2020 events (thou) | Description                     |
|----|--------------|--------------------|---------------------------------|
| 72 | G5730        | 94.6               | Atrial fibrillation             |
| 73 | G58          | 38.0               | Heart failure                   |
| 74 | G5731        | 7.3                | Atrial flutter                  |
| 75 | G57y7        | 4.3                | Sinus tachycardia               |
| 76 | G573         | 4.0                | Atrial fibrillation and flutter |

**e XaQVY “QRISK2 cardiovascular disease 10 year risk score”**

**f XaKfX “Average home systolic blood pressure”**



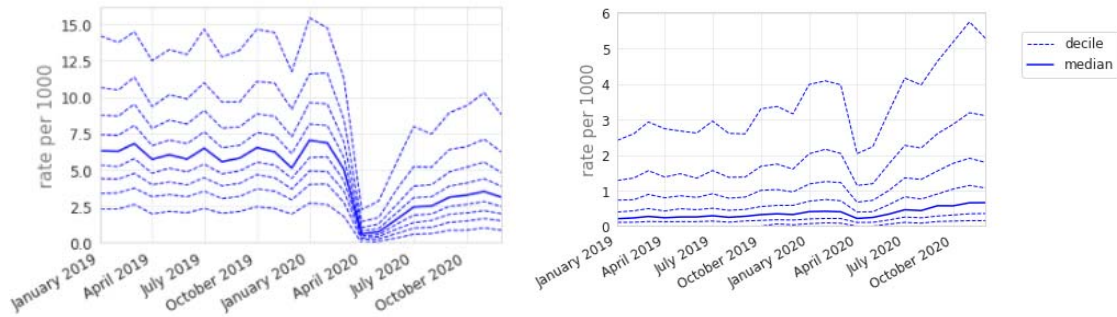

Figure 1. Recording of grouped subsets of cardiovascular CTV3 codes across TPP practices in England (January 2019 - December 2020). (a) “Examination of cardiovascular system (& [vascular system])”. (b) “Electrocardiography”, (c) “Cardiovascular symptoms (& [heart])”, (d) “Other forms of heart disease”, (e) “QRISK2 cardiovascular disease 10 year risk score”, (f) “Average home systolic blood pressure”. Each group includes CTV3 codes that begin with the digits shown and is not necessarily an exhaustive collection of every activity related to the description. For grouped codes (a-d), the top 5 codes represented within each group are listed in tables below each graph.

## Diabetes

Diabetic monitoring and HbA1c testing both experienced a large drop with good recovery (April -87.5%, December -16.6%; April -86.2%, December -0.6%; Table 1b, Figure 2a-b). For Diabetic Retinopathy Screening, the median dropped to zero in April, with limited recovery by December (-53.7%; Figure 2c). For “right diabetic foot at low risk”, the median dropped to zero in April, with good recovery by December (-18.0%; Figure 2d). There was substantial variation in the rate of diabetes monitoring and retinopathy screening at baseline, indicating some incompleteness.

**a** 66A - “Diabetic monitoring”

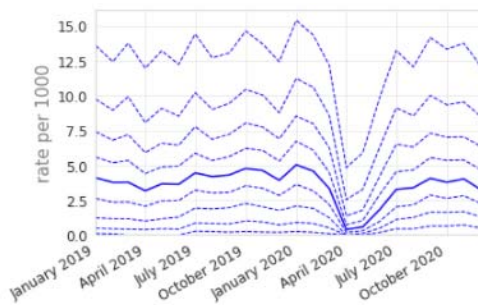

Top 'child' codes represented within parent code above:

| first_digits | 2020 events (thou) | Description |                              |
|--------------|--------------------|-------------|------------------------------|
| 0            | 66AS               | 516.5       | Diabetic annual review       |
| 1            | 66AP               | 338.1       | Diabetes: practice programme |
| 2            | 66A4               | 130.3       | Diabetic on oral treatment   |
| 3            | 66AI               | 104.3       | Diabetic - good control      |
| 4            | 66A                | 81.7        | Diabetic monitoring          |

**b** XaPbt - “Haemoglobin A1c level - IFCC standardised”

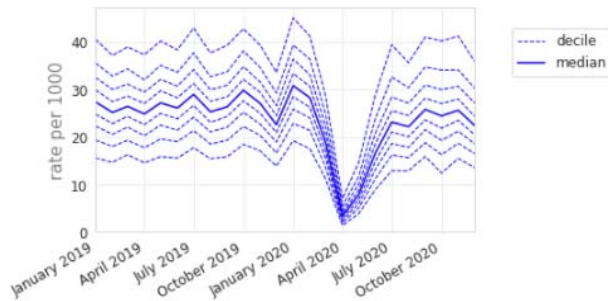

**c** Xallj - “Diabetic retinopathy screening”

**d** XaleH - “O/E - Right diabetic foot at low risk”

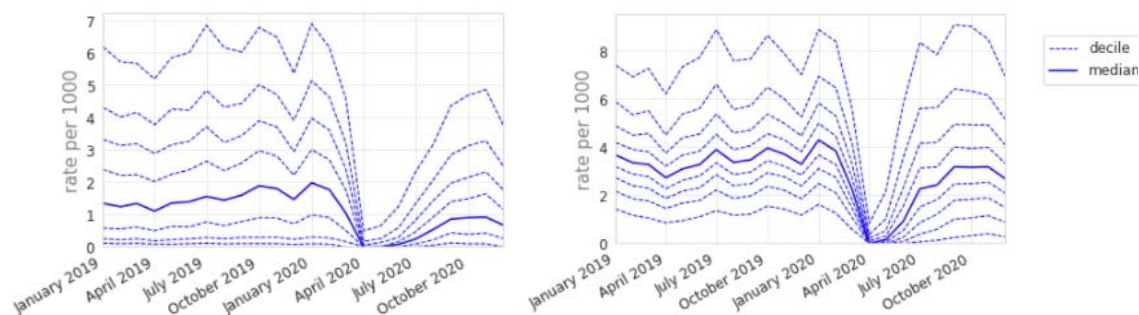

Figure 2. Recording of CTV3 codes across TPP practices in England (January 2019 - December 2020). (a) “Diabetic monitoring”, (b) “Haemoglobin A1c level - IFCC standardised”, (c) “Diabetic retinopathy screening”, (d) “O/E - Right diabetic foot at low risk”. Each code is not necessarily an exhaustive collection of every activity related to the description. O/E = “on examination”. “O/E - Left diabetic foot at low risk” is not shown but has an almost identical pattern to the right foot equivalent. Only ‘at low risk’ codes were included as codes related to moderate or increased risk did not meet the frequency threshold for the data driven analysis. For grouped codes (a), the top 5 codes represented within the group are listed under the graph.

## Mental health

The majority of mental health coded activity experienced a moderate decline during the initial stages of the pandemic, with incomplete recovery by December 2020 (Table 1c), e.g.

“Neurotic, personality and other nonpsychotic disorders”: April -44.5%, December -23.7% (Figure 3a); “Depressed mood”: April -64.7%, December -19.9% (Figure 3b). “Depression interim review” activity showed particularly poor recovery (April -56.2%, December -41.6%, Figure 3c).

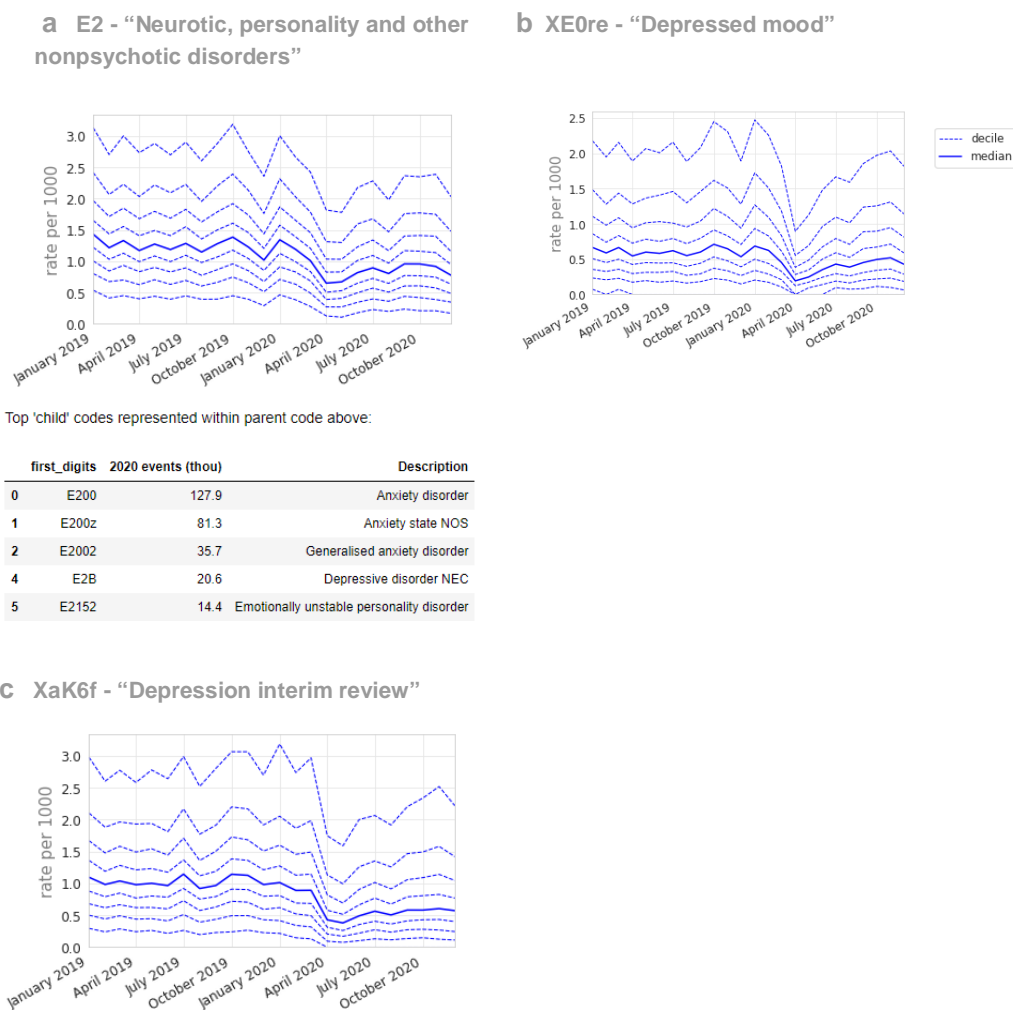

Figure 3. Recording of CTV3 codes across TPP practices in England (January 2019 - December 2020). (a) “Neurotic, personality and other nonpsychotic disorders”, (b) “Depression interim review”, (c) “Depressed mood”. Each code is not necessarily an exhaustive collection of every activity related to the description. For grouped codes (a), the top 5 codes represented within the group are listed under the graph.

## Female and reproductive health

The majority of female and reproductive-related activity experienced a moderate decline during the initial stages of the pandemic, with either recovery to near-normal levels by December 2020 or a return to an existing increasing or decreasing trend; for example “Contraception” (codes beginning “61”): April -60.6%, December +12.1% (Figure 4a).

“[Gynaecological] or [obstetric] history” showed a broadly similar pattern but with a slight sustained reduction (December -17.2%, Figure 4b). Various codes encompassed gynaecological and obstetric procedures and symptoms, which generally recovered to pre-pandemic levels, although many had a median of zero throughout the period. One example was “Disorder of breast” (Figure 4c, the most common code within which was “Breast lump”), which had a small increase by December (April -57.9%; December +17.8%).

Codes related to infant health such as six-week checks only had a small drop and recovered to near-normal levels, perhaps following a slightly decreasing trend (Figure 4d).

Codes for “Patient currently pregnant” reduced slightly and a small reduction was maintained through to December (Figure 4e).

**a 61 - "Contraception"**

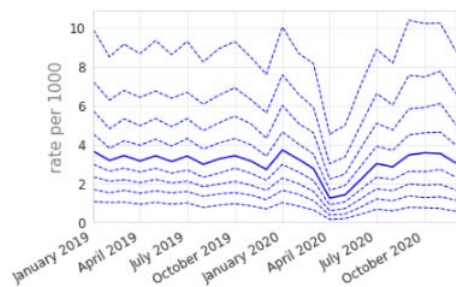

Top 'child' codes represented within parent code above:

|   | first_digits | 2020 events (thou) | Description                         |
|---|--------------|--------------------|-------------------------------------|
| 0 | 611          | 428.2              | General contraceptive advice        |
| 1 | 614          | 196.5              | Oral contraception                  |
| 2 | 61           | 147.2              | Contraception                       |
| 3 | 6148         | 117.0              | Progestogen only oral contraceptive |
| 4 | 612Z         | 94.6               | Contraception not needed NOS        |

**b 15 - "[Gynaecological] or [obstetric] history"**

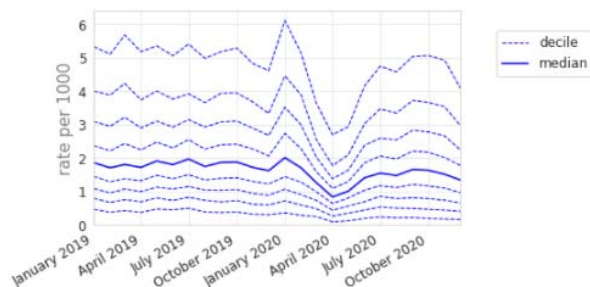

Top 'child' codes represented within parent code above:

|    | first_digits | 2020 events (thou) | Description                    |
|----|--------------|--------------------|--------------------------------|
| 28 | 1513         | 181.4              | Last menstrual period -1st day |
| 29 | 1514         | 172.8              | Estimated date of delivery     |
| 30 | 156          | 116.0              | Contraceptive history          |
| 31 | 151A         | 28.7               | Duration of menstrual flow     |
| 32 | 153          | 28.6               | Gravida                        |

**c K3 - "Disorder of breast"**

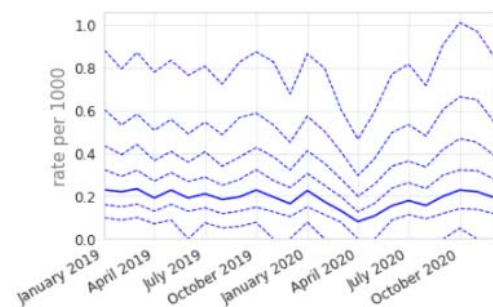

Top 'child' codes represented within parent code above:

|     | first_digits | 2020 events (thou) | Description               |
|-----|--------------|--------------------|---------------------------|
| 176 | K3171        | 43.3               | Breast lump               |
| 177 | K317         | 31.4               | Breast signs and symptoms |
| 178 | K3           | 7.7                | Disorder of breast        |
| 179 | K3174        | 1.8                | Discharge from nipple     |
| 180 | K3108        | 1.4                | Breast infection          |

**d 64 - "(Child health care)(inf feed meth)(breast/oth feed diff age)"**

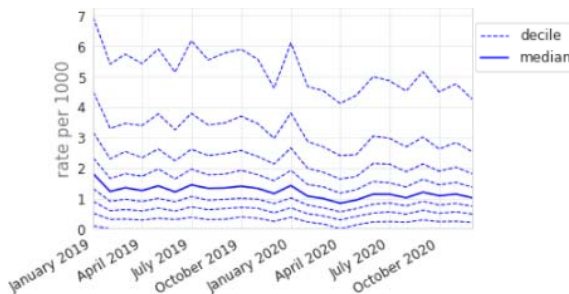

Top 'child' codes represented within parent code above:

|    | first_digits | 2020 events (thou) | Description                     |
|----|--------------|--------------------|---------------------------------|
| 52 | 6421         | 62.8               | Bottle fed at 6 weeks           |
| 53 | 64D4         | 47.1               | Child 6 week examination normal |
| 54 | 6422         | 45.0               | Breast fed at 6 weeks           |
| 55 | 64N3         | 35.9               | Child examination.: hips        |
| 56 | 64N8         | 28.0               | Child examination.: genitalia   |

**c 621 - "Patient currently pregnant"**

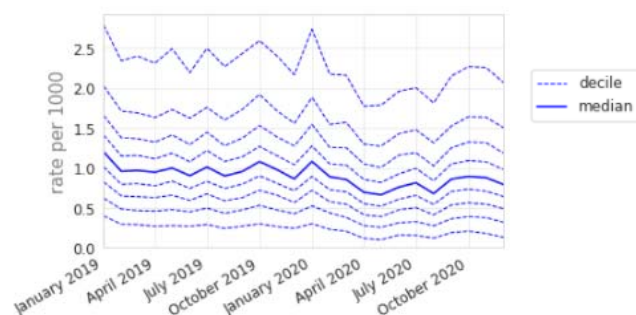

Top 'child' codes represented within parent code above:

|    | first_digits | 2020 events (thou) | Description                |
|----|--------------|--------------------|----------------------------|
| 10 | 621          | 303.2              | Patient currently pregnant |
| 11 | 621Z         | 14.5               | Patient pregnant NOS       |
| 12 | 6219         | 2.9                | Possible pregnancy         |
| 13 | 6216         | 2.8                | Pregnant - planned         |

Figure 4. Recording of grouped subsets of female and reproductive health-related CTV3 codes across TPP practices in England (January 2019 - December 2020). (a) "Contraception". (b) "[Gynaecological] or [obstetric] history", (c) "Patient currently pregnant". Each CTV3 code does not necessarily represent all activity related to the description. The top 5 codes represented within each group are listed under the graph.

## Screening and related activity

The majority of screening and related activity experienced a substantial decline, with recovery to slightly above normal levels by December 2020 (Table 1e), e.g. "Bowel cancer screening programme: faecal occult blood result" (April median -52.1%, December +12.0%) and "Cervical screening" (April -95.6%, December +20.9%). However, the patterns of recovery differed, with bowel cancer screening only beginning to recover around September while cervical screening was near normal by July (Figure 5a-b).

NHS health checks reduced from 1.8 per thousand in February to close to zero activity in April 2020 (median 0.0, with some recovery but median remaining zero by December 2020 (Figure 5c). Alcohol screening had a skewed distribution with a median of only 0.1 records per thousand in February 2020, reducing to zero in April and December 2020.



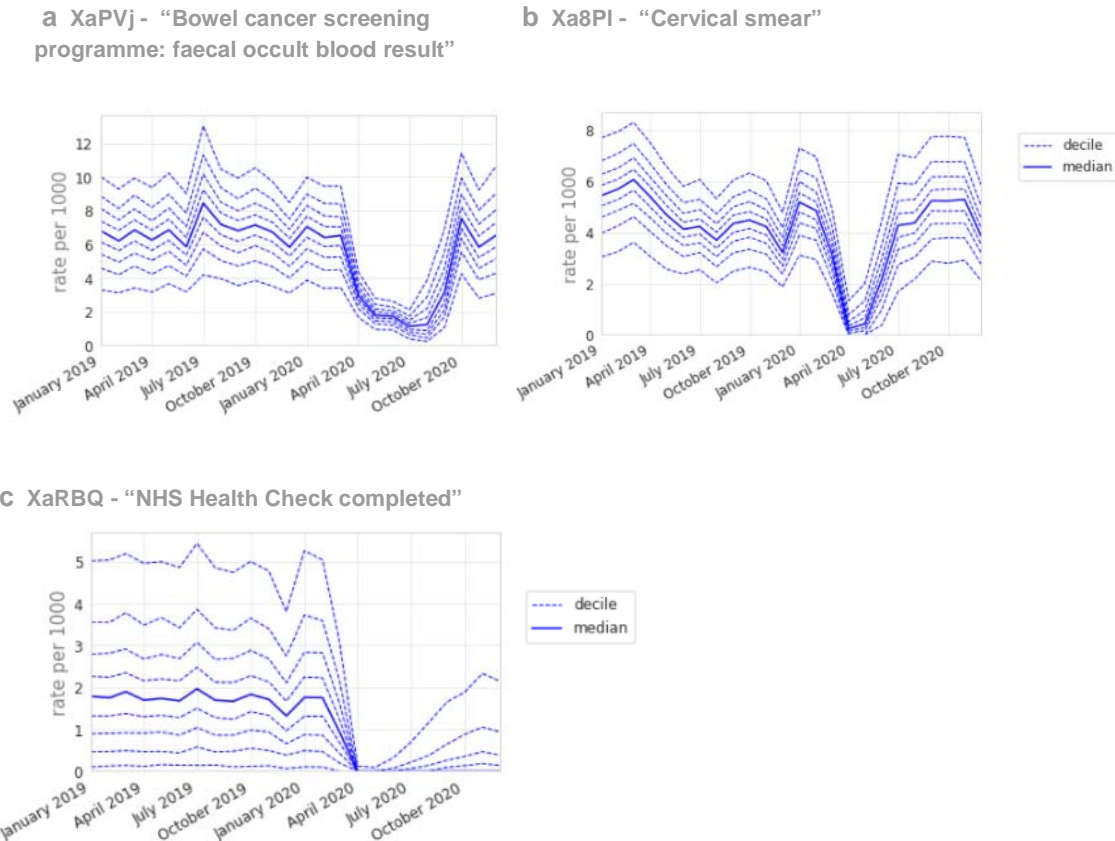

Figure 5. Recording of screening-related CTV3 codes across TPP practices in England (January 2019 - December 2020). (a) “Bowel cancer screening programme: faecal occult blood result”. (b) “Cervical Screening”, (c) “NHS Health Check completed”. Each CTV3 code does not necessarily represent all activity related to the description. Note, Diabetic retinopathy screening was also included with screening codes, but is discussed in the Diabetes section.

## Processes related to medication

Several codes explicitly mentioned “medication review”, most commonly XaF8d “Medication review done” (7.25m occurrences, Figure 6a), which experienced a small dip and gradual recovery (April median -31.0%, December -8.2%). Other medication review codes (e.g. review by pharmacist, for a specific disease, or indicating presence/absence of patient), were used less consistently between practices.

Several codes, generally uncommon but increasing in usage, were likely recorded as part of a medication review, such as “Patient understands why taking all medication” (Figure 6b; February median 0.1, April 0.0, December 0.4), and “Able to manage medication” (Xa2yC).

From September 2020 Structured medication reviews appeared (Figure 6c) and increased rapidly to around 350k records per month; however, some practices were recording them at much higher rates than others (Figure 6d).



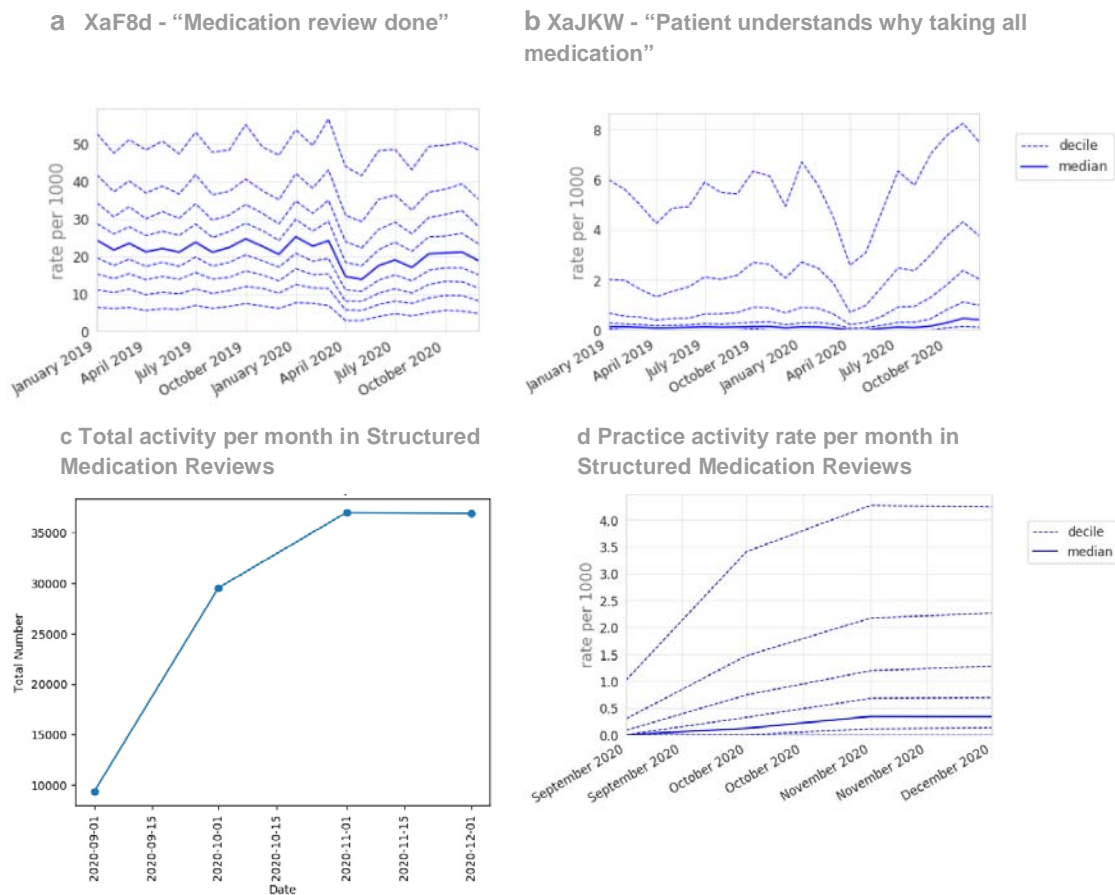

Figure 6. Recording of CTV3 codes across TPP practices in England. (a) "Medication review done" (January 2019 - December 2020) (b) "Patient understands why taking all medication". (c) Total recording of Structured Medication Reviews across TPP practices in England throughout their period of use to date (September 2020 - December 2020), and (d) practice deciles showing the rate per 1000 registered patients for Structured Medication Reviews. Each code is not necessarily an exhaustive collection of every activity related to the description.

# Discussion

## Summary

We identified widespread but also heterogeneous changes in clinical activity in primary care since the onset of the COVID-19 pandemic. There was generally good recovery by December 2020, with some exceptions: notably mental health, which showed minimal recovery. There was also variation from the median across practices, for both baseline and recovery.

## Strengths and weaknesses

The key strengths are the scale and completeness of the underlying raw EHR data, available close to real time, and we engaged with clinicians for added context. All processed data and analytical code is openly available in the Supplementary Materials or Github. We will publish our recommended key measures in a live updating report, and we encourage other groups to use OpenSafely for further exploration. Our data-driven approach is intended to generate an overall picture of primary care clinical activity, and explore high volume areas that might otherwise be missed, for example when not included in manually curated codelists.

Despite the strengths we recognise some limitations as previously discussed.<sup>11</sup> Our data-driven approach and filtering processes may have omitted some relevant codes; codes do not necessarily indicate unique or new events, and may be affected by changes in coding behaviour. All coded activity for patients registered at the end of the study period were included, and all activity was included under their latest practice. Patients who died or deregistered from TPP practices during the study period were not included. Overall, activity counts were up to 6-8% lower than database totals in the earliest months of the study period.

## Interpretation and context for each clinical area

Given the diversity of clinical areas covered by this overarching analysis, the clinical advisory group evaluated and interpreted the variation for each clinical area separately.

### *CVD*

Much coded activity related to monitoring, and remained around 40% reduced from pre-pandemic levels. This was not surprising due to changes in guidance and financial incentives.<sup>16</sup> We warn that electrocardiogram data should be interpreted cautiously as this is often conducted outside primary care and not always systematically coded. The lack of recovery in QRISK2 scores may have public health significance, potentially causing later diagnosis of heart disease and poorer early management. Home blood pressure coding unsurprisingly increased, however home monitoring in general may not always be recorded completely or consistently in GP records. The consistent pattern of decrease in most cardiovascular related activity is in line with results from other studies in the UK.<sup>8,17,18</sup> This is of particular interest because delays in the management of high blood pressure are

associated with worse clinical outcomes.<sup>19</sup> The clinical advisory group proposed “blood pressure monitoring” and “QRISK2 risk scores” (or any cardiovascular risk score codes including the newer QRISK3 codes) as key measures.

### *Diabetes*

Routine diabetes care almost entirely stopped, but largely rapidly recovered, e.g. HbA1c testing was near normal by December 2020. Diabetes monitoring and foot checks remained slightly below normal. In some areas, concerning foot changes may be seen by specialist services, hence may sometimes appear reduced in primary care. Diabetic retinopathy screening recovered less well; however, specialist clinics conduct this service and send reports to primary care which are manually coded, therefore the sustained drop may indicate a coding change or other provider changes. Most diabetes care activity varied widely between practices, possibly due to differences in demographics and prevalence; coding (e.g. use of data entry templates in electronic health record systems); use of external providers; or quality of care. Our results add to the findings from earlier studies which reported a rapid decline in the rate of new diabetes mellitus (DM) diagnoses and HbA1c testing in April 2020,<sup>8,18</sup> and are in line with data showing good but incomplete recovery in the following months.<sup>20,21</sup> The clinical advisory group proposed HbA1c testing as a key sentinel measure.

### *Mental Health*

Most mental health activity coded by GPs showed a sustained reduction. This was consistent across various markers of activity. This was surprising given the much-discussed impact of the pandemic on mental health<sup>22,23</sup>, but may be explained by patients either not seeking help or choosing other services/online resources. The latter are unlikely to explain all the reduction. For example, a recent study on mental health and telepsychiatry showed that the rapid shift to remote service delivery has not reached some groups of patients (in particular patients with dementia and mild cognitive impairment) who may require more tailored management<sup>24</sup>. Dementia was not widely represented in our results, perhaps being covered by a range of CTv3 codes; we will conduct further research on the impacts of COVID on dementia in primary care to capture this fully.

The reduction in “Depression interim review” may warrant further investigation, but could reflect a change in coding behaviour. However, the similar reduction in codes for depressed mood would argue against this as the sole explanation. Nationally, the prescribing of antidepressants in primary care was sustained, indicating that access to some treatment was maintained (Figure S1). Further analyses are planned before proposing any single measure for immediate ongoing monitoring, as mental health activity (especially for depression and other mood disorders) spans different services such as community mental health trusts<sup>25</sup>, which have limited coverage in OpenSAFELY.

Previous research similarly showed that primary care-recorded diagnosis of common mental health conditions, and associated prescribing, reduced significantly in early 2020 and did not recover to pre-pandemic levels by the end of 2020.<sup>8,18,26</sup> One region found a reduction in self harm in primary care sustained through to May 2021.<sup>27</sup> Other studies suggest that the impact on mental health may have been temporary, but following a generally worsening trend<sup>28</sup> and the English health department have responded by developing a targeted action plan.<sup>29</sup>

### *Female and Reproductive Health*

Female and reproductive health clinical activity generally declined modestly around April 2020, with widespread recovery by December 2020. The reduction in contraception-related activity (discussion and monitoring) was likely explained by a combination of reduced need (less social contact, use of non-prescription alternatives), longer repeat prescriptions, check-ups being postponed, and long acting reversible contraception (LARC), including coils and implants, not being fitted. Monthly contraceptive prescribing in England experienced only a small temporary reduction during the pandemic (<sup>9</sup> and Figure S2). Six-week checks of infants were well maintained, likely prioritised as vital activities, possibly aided by increased use of telephone appointments and/or being carried out alongside 8-week immunisations, which were also prioritised.<sup>30</sup> The slight increase in breast-related symptoms by December 2020 may indicate concerning delays in presentation. Current pregnancy records being slightly reduced may be explained by delayed presentation or increased use of self-referral directly to midwifery services. Other codes commonly recorded with pregnancy, e.g. date of last menstrual period, would be reduced for the same reasons. The low level of gestational diabetes indicates some codes for this condition were likely not captured here. Researchers have previously raised concerns about disruptions to sexual and reproductive health care services in the early stages of the pandemic.<sup>31</sup> Although we observed a decline in female and reproductive health activities in primary care, most activities returned to near or above pre-pandemic levels by December.

### *Screening and Related Activity*

Broadly, clinical activity related to screening declined substantially around April 2020, and there was widespread recovery by December to slightly above normal levels, with the exception of NHS health checks. The National Screening programme paused invitations for bowel screening in March 2020, and they were subsequently issued at rates above 100% of normal levels.<sup>32</sup> NHS health checks were considered as “low priority” in the Royal College of General Practitioners (RCGP) workload prioritisation.<sup>30</sup> The clinical advisory group did not propose any measures for ongoing monitoring.

Some studies outside the UK have investigated the impact caused by disruption to screening services, and found evidence for example that new breast cancer diagnoses were reduced<sup>33</sup> and some groups may have been affected more than others.<sup>34</sup>

### *Medication Processes*

Processes related to medication, in particular medication reviews, were relatively well maintained during the pandemic, likely due to automated alerts commonly prompting clinicians when these are due. Guidance on the new Structured Medicine Reviews was released in September 2020<sup>35</sup> and uptake was relatively rapid. Other related codes, such as “Patient understands why taking all medication” are likely recorded during structured medication reviews, which explains why they also increased. Not all practices were recording Structured Medicine Reviews by January 2021, likely because pharmacists with the necessary training were not available in all practices. Use of this process is incentivised for 2021/22 for certain patient groups.<sup>35</sup> The clinical advisory group proposed a key measure comprising any medication reviews.

## Policy implications and interpretation

The COVID-19 pandemic brought new challenges for the NHS to deliver safe and effective routine care. Despite the ongoing pressure of the pandemic, most primary care activities recovered to near-normal levels by December 2020, while some aspects of routine monitoring had not fully recovered. Our proposed *NHS Service Restoration Observatory* can support evaluation of national policies around service restoration and additionally provide opportunities for near real-time audit and feedback to rapidly identify and resolve concerns around health service activity. In particular we hope that data tools such as ours can be used to ensure continuity of high priority clinical services during subsequent waves of the pandemic.

## Future research

Across the clinical specialist areas we identified common themes for further research following this study with further detail on individual areas given (detailed list in Supplementary Information). OpenSAFELY is a national data resource and we encourage interested parties to consider exploring these patterns in the platform.

1. Monitoring activity in more granular groups such as those with established long term conditions, those receiving certain medicines, or those without prior history having new diagnoses, to establish the impact on each group and on new diagnoses vs ongoing monitoring.
2. The level of “backlog” could be analysed to inform NHS recovery plans and to establish whether those people who missed activities have later “caught up” and whether there are some groups waiting longer than others.
3. The pandemic offers an unprecedented natural experiment in new diagnoses and ongoing monitoring of patients’ conditions. Outcomes can be assessed to identify any clinical impacts on patients or tests that can be safely delayed without unintended impacts to free up health care capacity.
4. The impact on cancer referrals/stage at diagnosis in those with relevant symptoms e.g. breast symptoms or who missed screening.
5. Each topic should be assessed in the context of health inequalities to explore whether impacts affected some groups more than others, and should take into account other activity, e.g. prescriptions, referrals, and non-primary care activity.

### Summary

We identified substantial and widespread changes in clinical activity in primary care since the onset of the COVID-19 pandemic, but there was generally good recovery by December 2020, with a few exceptions such as mental health which showed poor recovery, which warrant further investigation. The authors are now further developing the *OpenSAFELY NHS Service Restoration Observatory* for real-time monitoring of the key measures identified here as well as further studies, using primary care data to monitor and mitigate the indirect health impacts of Covid-19 on the NHS.

## Administrative

### Acknowledgements

We are very grateful for all the support received from the TPP Technical Operations team throughout this work, and for generous assistance from the information governance and database teams at NHS England / NHSX. We also thank other contributors to the clinical advisory group including Raj Patel, Marion Wood, Rammya Mathew, and John Geddes. The views expressed are those of the authors and not necessarily those of the UK National Health Service, the NIHR, or the UK Department of Health.

### Conflicts of interest

Authors declare the following: BG has received research funding from the Laura and John Arnold Foundation, the NHS National Institute for Health Research (NIHR), the NIHR School of Primary Care Research, the NIHR Oxford Biomedical Research Centre, the Mohn-Westlake Foundation, NIHR Applied Research Collaboration Oxford and Thames Valley, the Wellcome Trust, the Good Thinking Foundation, Health Data Research UK, the Health Foundation, the World Health Organisation, UKRI, Asthma UK, the British Lung Foundation, and the Longitudinal Health and Wellbeing strand of the National Core Studies programme; he also receives personal income from speaking and writing for lay audiences on the misuse of science. BMK is also employed by NHS England working on medicines policy and clinical lead for primary care medicines data. AC is supported by the National Institute for Health Research (NIHR) Oxford Cognitive Health Clinical Research Facility, by an NIHR Research Professorship (grant RP-2017-08-ST2-006), by the NIHR Oxford and Thames Valley Applied Research Collaboration and by the NIHR Oxford Health Biomedical Research Centre (grant BRC-1215-20005). AC has also received research, educational and consultancy fees from INCiPiT (Italian Network for Paediatric Trials), CARIPO Foundation and Angelini Pharma. SF is funded by a Wellcome Senior Research Fellowship in Clinical Science. RCon declares Honoraria for Work with Primary Care Pharmacy Association. KC works as a GP in Oxford and is Deputy Medical Director for Primary Care, NHS England and NHS Improvement. MS is an NIHR funded academic clinical fellow in primary care. MM is NHS GIRFT Senior Clinical Advisor for Pathology.

### Funding

This work was jointly funded by UKRI (COV0076;MR/V015737/1), NIHR and Asthma UK-BLF [COV0076; MR/V015737/] and the Longitudinal Health and Wellbeing strand of the National Core Studies programme (MC\_PC\_20030: MC\_PC\_20059: COV-LT-0009). The OpenSAFELY data science platform is funded by the Wellcome Trust (222097/Z/20/Z). BG's work on better use of data in healthcare more broadly is currently funded in part by: the Bennett Foundation, the Wellcome Trust, NIHR Oxford Biomedical Research Centre, NIHR Applied Research Collaboration Oxford and Thames Valley, the



Mohn-Westlake Foundation; all Bennett Institute staff are supported by BG's grants on this work. The views expressed are those of the authors and not necessarily those of the NIHR, NHS England, Public Health England or the Department of Health and Social Care. Funders had no role in the study design, collection, analysis, and interpretation of data; in the writing of the report; and in the decision to submit the article for publication.

## Information governance and ethical approval

NHS England is the data controller; TPP is the data processor; and the key researchers on OpenSAFELY are acting with the approval of NHS England. This implementation of OpenSAFELY is hosted within the TPP environment which is accredited to the ISO 27001 information security standard and is NHS IG Toolkit compliant;<sup>36,37</sup> patient data has been pseudonymised for analysis and linkage using industry standard cryptographic hashing techniques; all pseudonymised datasets transmitted for linkage onto OpenSAFELY are encrypted; access to the platform is via a virtual private network (VPN) connection, restricted to a small group of researchers; the researchers hold contracts with NHS England and only access the platform to initiate database queries and statistical models; all database activity is logged; only aggregate statistical outputs leave the platform environment following best practice for anonymisation of results such as statistical disclosure control for low cell counts.<sup>38</sup> The OpenSAFELY research platform adheres to the obligations of the UK General Data Protection Regulation (GDPR) and the Data Protection Act 2018. In March 2020, the Secretary of State for Health and Social Care used powers under the UK Health Service (Control of Patient Information) Regulations 2002 (COPI) to require organisations to process confidential patient information for the purposes of protecting public health, providing healthcare services to the public and monitoring and managing the COVID-19 outbreak and incidents of exposure; this sets aside the requirement for patient consent.<sup>39</sup> Taken together, these provide the legal bases to link patient datasets on the OpenSAFELY platform. GP practices, from which the primary care data are obtained, are required to share relevant health information to support the public health response to the pandemic, and have been informed of the OpenSAFELY analytics platform.

This study was approved by the Health Research Authority (REC reference 20/LO/0651).

## Guarantor

HJC is guarantor.



## References

1. Moynihan R, Sanders S, Michaleff ZA, Scott AM, Clark J, To EJ, et al. Impact of COVID-19 pandemic on utilisation of healthcare services: a systematic review. *BMJ Open* [Internet]. 2021 Mar 16;11(3):e045343. Available from: <http://dx.doi.org/10.1136/bmjopen-2020-045343>
2. NHS England. Second phase of NHS response to COVID-19 [Internet]. 2020. Available from: <https://www.england.nhs.uk/coronavirus/publication/second-phase-of-nhs-response-to-covid-19-letter-from-simon-stevens-and-amanda-pritchard/>
3. NHS England. Urgent next steps on NHS response to covid-19: Simon Stevens letter to local NHS organisations [Internet]. 2020. Available from: <https://www.england.nhs.uk/coronavirus/wp-content/uploads/sites/52/2020/03/urgent-next-steps-on-nhs-response-to-covid-19-letter-simon-stevens.pdf>
4. World Health Organization. COVID-19 Strategic Preparedness and Response Plan - Operational planning guidance to support country preparedness and response. World Health Organization; 2020 May. Report No.: 1.0.
5. World Health Organization. Maintaining essential health services: operational guidance for the COVID-19 context. World Health Organization; 2020 Jun. Report No.: WHO/2019-nCoV/essential\_health\_services/2020.2.
6. NHS England. Implementing phase 3 of the NHS response to the COVID-19 pandemic [Internet]. NHS England; 2020 Aug [cited 2021 Oct 19]. Report No.: 1.1. Available from: <https://www.england.nhs.uk/publication/implementing-phase-3-of-the-nhs-response-to-the-covid-19-pandemic/>
7. Xiong J, Lipsitz O, Nasri F, Lui LMW, Gill H, Phan L, et al. Impact of COVID-19 pandemic on mental health in the general population: A systematic review. *J Affect Disord* [Internet]. 2020 Dec 1;277:55–64. Available from: <https://www.sciencedirect.com/science/article/pii/S0165032720325891>
8. Williams R, Jenkins DA, Ashcroft DM, Brown B, Campbell S, Carr MJ, et al. Diagnosis of physical and mental health conditions in primary care during the COVID-19 pandemic: a retrospective cohort study. *Lancet Public Health* [Internet]. 2020 Oct;5(10):e543–50. Available from: [http://dx.doi.org/10.1016/S2468-2667\(20\)30201-2](http://dx.doi.org/10.1016/S2468-2667(20)30201-2)
9. Frazer JS, Frazer GR. Analysis of primary care prescription trends in England during the COVID-19 pandemic compared against a predictive model. *Fam Med Community Health* [Internet]. 2021 Aug;9(3). Available from: <http://dx.doi.org/10.1136/fmch-2021-001143>
10. Balachandren N, Barrett G, Stephenson JM, Yasmin E, Mavrelou D, Davies M, et al. Impact of the SARS-CoV-2 pandemic on access to contraception and pregnancy intentions: a national prospective cohort study of the UK population. *BMJ Sex Reprod Health* [Internet]. 2021 Oct 21; Available from: <http://dx.doi.org/10.1136/bmjsex-2021-001164>
11. Curtis HJ, MacKenna B, Croker R, Inglesby P, Walker AJ, Morley J, et al. OpenSAFELY NHS Service Restoration Observatory 1: describing trends and variation in primary care clinical activity for 23.3 million patients in England during the first wave of COVID-19. *Br J Gen Pract* [Internet]. 2021 Sep; Available from: <https://bjgp.org/content/early/2021/09/24/BJGP.2021.0380>

12. Barron E, Bakhai C, Kar P, Weaver A, Bradley D, Ismail H, et al. Associations of type 1 and type 2 diabetes with COVID-19-related mortality in England: a whole-population study. *The Lancet Diabetes & Endocrinology* [Internet]. 2020 Oct 1;8(10):813–22. Available from: [https://doi.org/10.1016/S2213-8587\(20\)30272-2](https://doi.org/10.1016/S2213-8587(20)30272-2)
13. Holman N, Knighton P, Kar P, O’Keefe J, Curley M, Weaver A, et al. Risk factors for COVID-19-related mortality in people with type 1 and type 2 diabetes in England: a population-based cohort study. *The Lancet Diabetes & Endocrinology* [Internet]. 2020 Oct 1;8(10):823–33. Available from: [https://doi.org/10.1016/S2213-8587\(20\)30271-0](https://doi.org/10.1016/S2213-8587(20)30271-0)
14. Silverio A, Di Maio M, Citro R, Esposito L, Iuliano G, Bellino M, et al. Cardiovascular risk factors and mortality in hospitalized patients with COVID-19: systematic review and meta-analysis of 45 studies and 18,300 patients. *BMC Cardiovasc Disord* [Internet]. 2021 Jan 7;21(1):23. Available from: <http://dx.doi.org/10.1186/s12872-020-01816-3>
15. Williamson EJ, Walker AJ, Bhaskaran K, Bacon S, Bates C, Morton CE, et al. Factors associated with COVID-19-related death using OpenSAFELY. *Nature* [Internet]. 2020 Aug;584(7821):430–6. Available from: <http://dx.doi.org/10.1038/s41586-020-2521-4>
16. NHS England and NHS Improvement. 2020/21 General Medical Services (GMS) contract Quality and Outcomes Framework (QOF) - guidance for GMS contract 2020/21 in England [Internet]. 2020 Sep. Available from: <https://www.england.nhs.uk/wp-content/uploads/2020/09/C0713-202021-General-Medical-Services-GMS-contract-Quality-and-Outcomes-Framework-QOF-Guidance.pdf>
17. Fersia O, Bryant S, Nicholson R, McMeeken K, Brown C, Donaldson B, et al. The impact of the COVID-19 pandemic on cardiology services. *Open Heart* [Internet]. 2020 Aug;7(2). Available from: <http://dx.doi.org/10.1136/openhrt-2020-001359>
18. Mansfield KE, Mathur R, Tazare J, Henderson AD, Mulick AR, Carreira H, et al. Indirect acute effects of the COVID-19 pandemic on physical and mental health in the UK: a population-based study. *Lancet Digit Health* [Internet]. 2021 Apr;3(4):e217–30. Available from: [http://dx.doi.org/10.1016/S2589-7500\(21\)00017-0](http://dx.doi.org/10.1016/S2589-7500(21)00017-0)
19. Xu W, Goldberg SI, Shubina M, Turchin A. Optimal systolic blood pressure target, time to intensification, and time to follow-up in treatment of hypertension: population based retrospective cohort study. *BMJ* [Internet]. 2015 Feb 5;350:h158. Available from: <http://dx.doi.org/10.1136/bmj.h158>
20. Carr MJ, Wright AK, Leelarathna L, Thabit H, Milne N, Kanumilli N, et al. Impact of COVID-19 on diagnoses, monitoring, and mortality in people with type 2 diabetes in the UK. *Lancet Diabetes Endocrinol* [Internet]. 2021 Jul;9(7):413–5. Available from: [http://dx.doi.org/10.1016/S2213-8587\(21\)00116-9](http://dx.doi.org/10.1016/S2213-8587(21)00116-9)
21. Carr MJ, Wright AK, Leelarathna L, Thabit H, Milne N, Kanumilli N, et al. Impact of COVID-19 restrictions on diabetes health checks and prescribing for people with type 2 diabetes: a UK-wide cohort study involving 618 161 people in primary care. *BMJ Qual Saf* [Internet]. 2021 Oct 12; Available from: <http://dx.doi.org/10.1136/bmjqs-2021-013613>
22. COVID-19 Mental Disorders Collaborators. Global prevalence and burden of depressive and anxiety disorders in 204 countries and territories in 2020 due to the COVID-19 pandemic. *Lancet* [Internet]. 2021 Nov 6;398(10312):1700–12. Available from: [http://dx.doi.org/10.1016/S0140-6736\(21\)02143-7](http://dx.doi.org/10.1016/S0140-6736(21)02143-7)
23. Pierce M, Hope H, Ford T, Hatch S, Hotopf M, John A, et al. Mental health before and

- during the COVID-19 pandemic: a longitudinal probability sample survey of the UK population. *Lancet Psychiatry* [Internet]. 2020 Oct;7(10):883–92. Available from: [http://dx.doi.org/10.1016/S2215-0366\(20\)30308-4](http://dx.doi.org/10.1016/S2215-0366(20)30308-4)
24. Hong JS, Sheriff R, Smith K, Tomlinson A, Saad F, Smith T, et al. Impact of COVID-19 on telepsychiatry at the service and individual patient level across two UK NHS mental health Trusts. *Evid Based Ment Health* [Internet]. 2021 Nov;24(4):161–6. Available from: <http://dx.doi.org/10.1136/ebmental-2021-300287>
  25. Bakolis I, Stewart R, Baldwin D, Beenstock J, Bibby P, Broadbent M, et al. Changes in daily mental health service use and mortality at the commencement and lifting of COVID-19 “lockdown” policy in 10 UK sites: a regression discontinuity in time design. *BMJ Open* [Internet]. 2021 May 26;11(5):e049721. Available from: <http://dx.doi.org/10.1136/bmjopen-2021-049721>
  26. Carr MJ, Steeg S, Webb RT, Kapur N, Chew-Graham CA, Abel KM, et al. Effects of the COVID-19 pandemic on primary care-recorded mental illness and self-harm episodes in the UK: a population-based cohort study. *The Lancet Public Health* [Internet]. 2021 Feb 1;6(2):e124–35. Available from: [https://doi.org/10.1016/S2468-2667\(20\)30288-7](https://doi.org/10.1016/S2468-2667(20)30288-7)
  27. Steeg S, Bojanić L, Tilston G, Williams R, Jenkins DA, Carr MJ, et al. Temporal trends in primary care-recorded self-harm during and beyond the first year of the COVID-19 pandemic: Time series analysis of electronic healthcare records for 2.8 million patients in the Greater Manchester Care Record. *EClinicalMedicine* [Internet]. 2021 Nov;41:101175. Available from: <http://dx.doi.org/10.1016/j.eclinm.2021.101175>
  28. Gagné T, Schoon I, McMunn A, Sacker A. Mental distress among young adults in Great Britain: long-term trends and early changes during the COVID-19 pandemic. *Soc Psychiatry Psychiatr Epidemiol* [Internet]. 2021 Nov 11; Available from: <http://dx.doi.org/10.1007/s00127-021-02194-7>
  29. COVID-19 mental health and wellbeing recovery action plan [Internet]. GOV.UK. 2021 [cited 2022 May]. Available from: <https://www.gov.uk/government/publications/covid-19-mental-health-and-wellbeing-recovery-action-plan>;
  30. RCGP. RCGP Guidance on workload prioritisation during COVID-19 [Internet]. 2021 [cited 2021 Nov 18]. Available from: <https://web.archive.org/web/20200421140124/https://www.rcgp.org.uk/-/media/Files/Policy/A-Z-policy/2020/covid19/RCGP%20guidance/202003233RCGPGuidanceprioritisationroutineworkduringCovidFINAL>
  31. Aly J, Haeger KO, Christy AY, Johnson AM. Contraception access during the COVID-19 pandemic. *Contracept Reprod Med* [Internet]. 2020 Oct 8;5:17. Available from: <http://dx.doi.org/10.1186/s40834-020-00114-9>
  32. NHS England. NHS Cancer Programme: Cancer services recovery plan [Internet]. NHS England; 2020 Dec. Report No.: 001559. Available from: <https://www.england.nhs.uk/coronavirus/wp-content/uploads/sites/52/2020/12/C0821-COVID-19-Cancer-services-recovery-plan-14-December-2020.pdf>
  33. Eijkelboom AH, de Munck L, Lobbes MBI, van Gils CH, Wesseling J, Westenend PJ, et al. Impact of the suspension and restart of the Dutch breast cancer screening program on breast cancer incidence and stage during the COVID-19 pandemic. *Prev Med* [Internet]. 2021 Oct;151:106602. Available from: <http://dx.doi.org/10.1016/j.ypmed.2021.106602>

34. Miller MM, Meneveau MO, Rochman CM, Schroen AT, Lattimore CM, Gaspard PA, et al. Impact of the COVID-19 pandemic on breast cancer screening volumes and patient screening behaviors. *Breast Cancer Res Treat* [Internet]. 2021 Aug;189(1):237–46. Available from: <http://dx.doi.org/10.1007/s10549-021-06252-1>
35. NHS England. Network Contract Directed Enhanced Service: Structured Medication Reviews and Medicines Optimisation: Guidance [Internet]. 2020 Sep. Available from: <https://www.england.nhs.uk/wp-content/uploads/2020/09/SMR-Spec-Guidance-2020-21-FINAL-.pdf>, <https://www.england.nhs.uk/publication/structured-medication-reviews-and-medicines-optimisation/>
36. BETA – Data Security Standards - NHS Digital [Internet]. NHS Digital. [cited 2020 Apr 30]. Available from: <https://digital.nhs.uk/about-nhs-digital/our-work/nhs-digital-data-and-technology-standards/framework/beta---data-security-standards>
37. Data Security and Protection Toolkit - NHS Digital [Internet]. NHS Digital. [cited 2020 Apr 30]. Available from: <https://digital.nhs.uk/data-and-information/looking-after-information/data-security-and-information-governance/data-security-and-protection-toolkit>
38. ISB1523: Anonymisation Standard for Publishing Health and Social Care Data - NHS Digital [Internet]. NHS Digital. [cited 2020 Apr 30]. Available from: <https://digital.nhs.uk/data-and-information/information-standards/information-standards-and-data-collections-including-extractions/publications-and-notifications/standards-and-collections/isb1523-anonymisation-standard-for-publishing-health-and-social-care-data>
39. Secretary of State for Health and Social Care - UK Government. Coronavirus (COVID-19): notification to organisations to share information [Internet]. 2020. Available from: <https://web.archive.org/web/20200421171727/https://www.gov.uk/government/publications/coronavirus-covid-19-notification-of-data-controllers-to-share-information>
